# Supplementary material
Source: PubMed Central journal article supplement (PMC3522401)

### BDNF\_locus\_in\_European\_ancestry

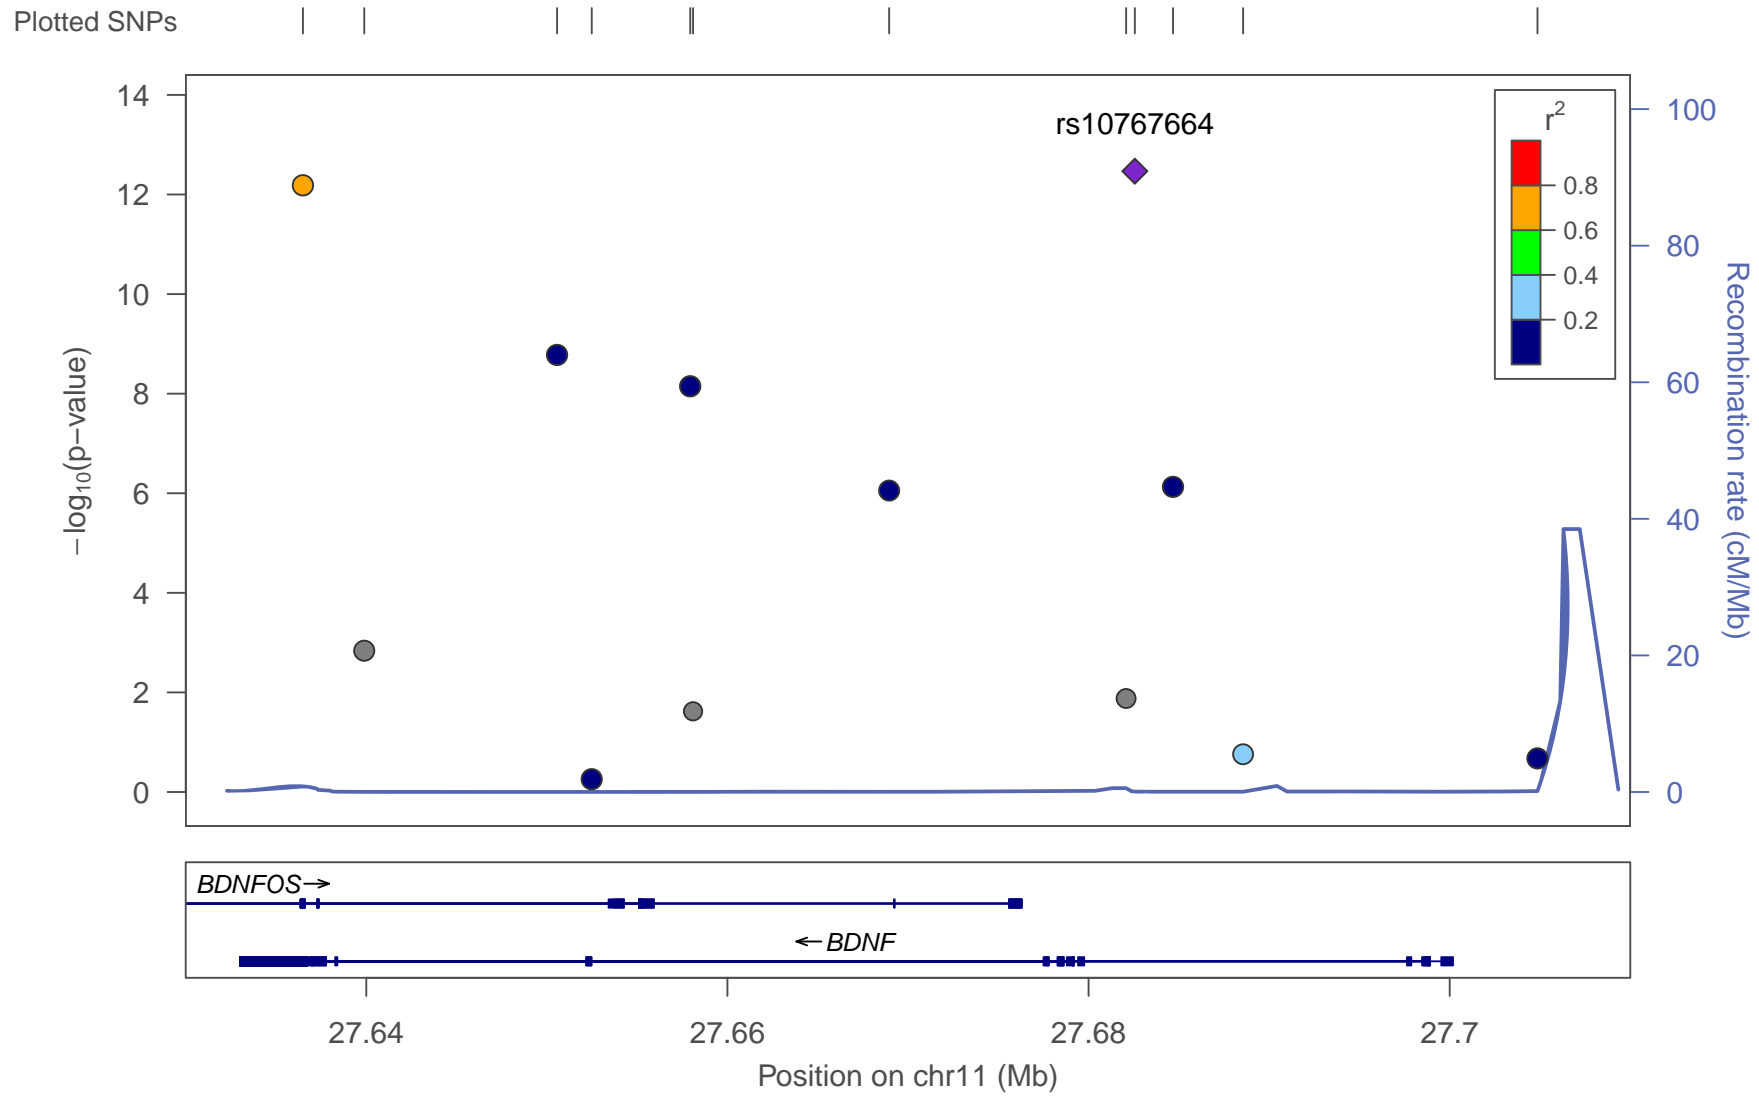

### BDNF\_locus\_in\_East\_Asians

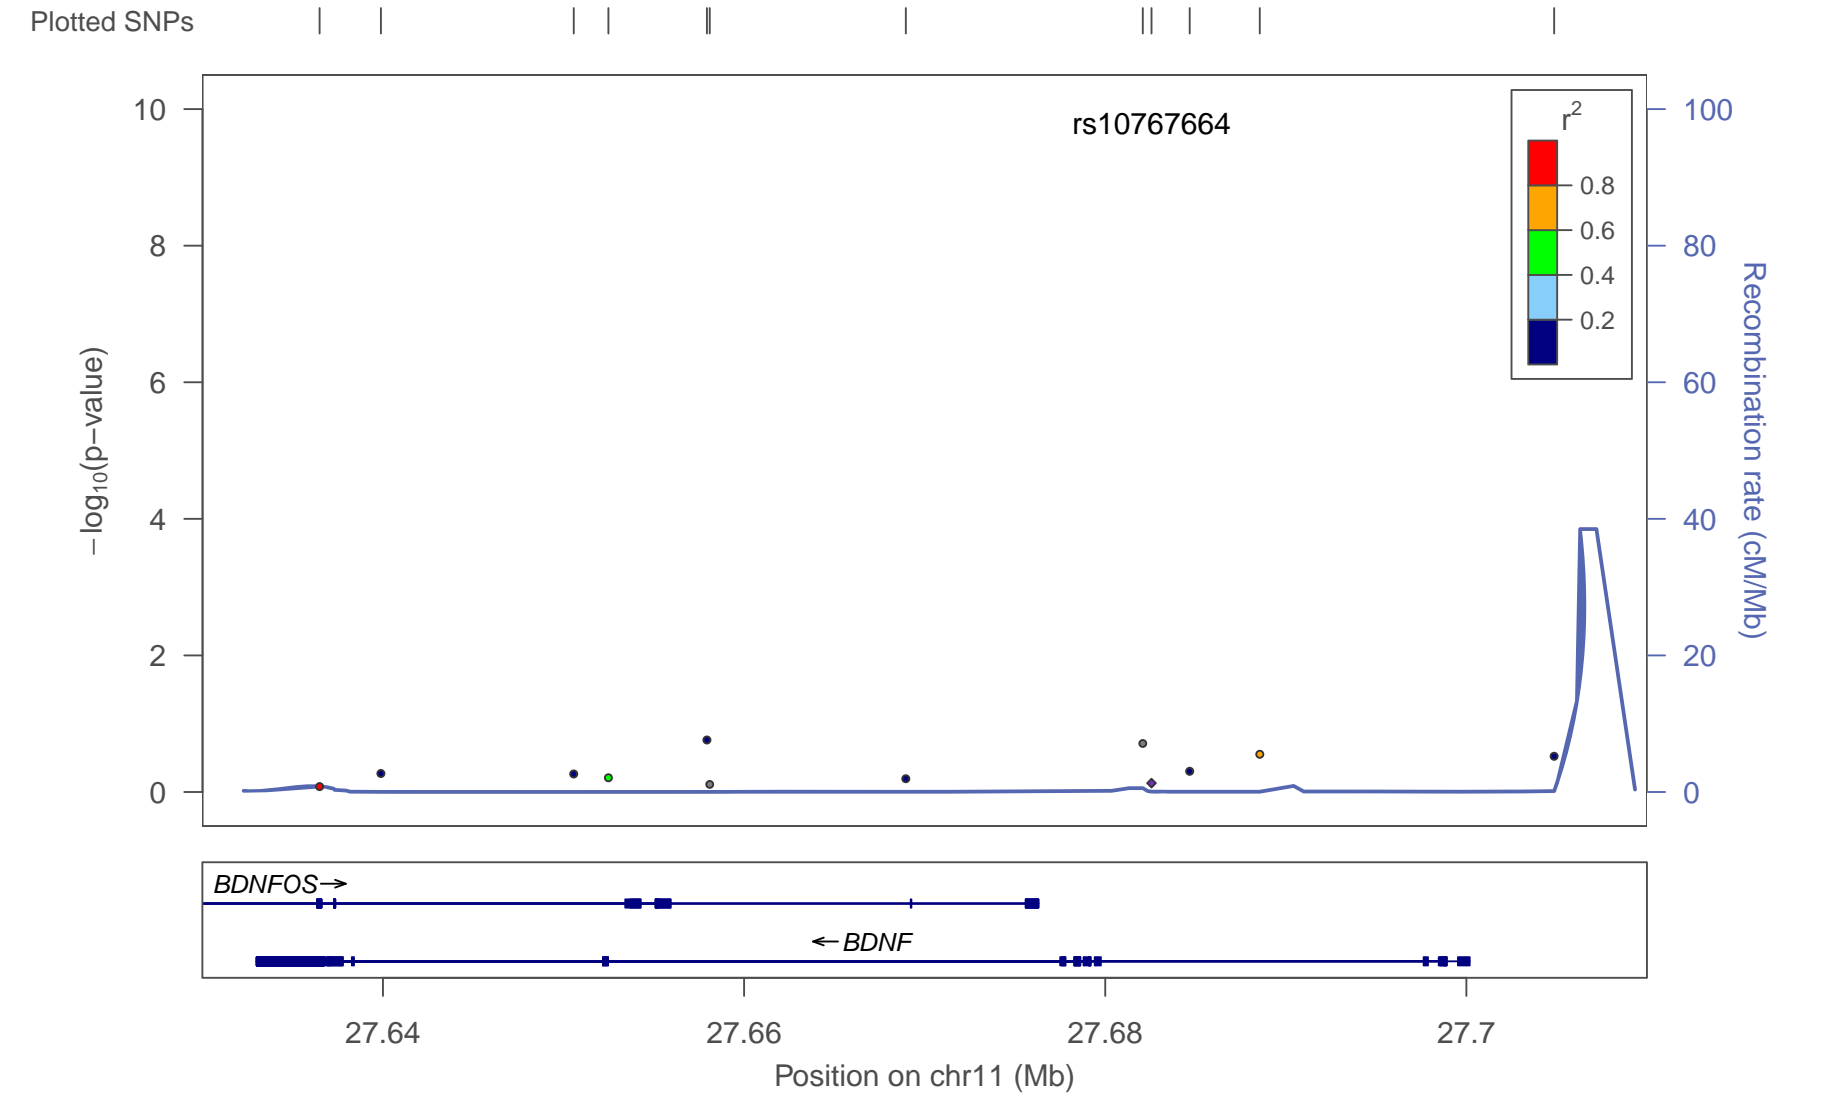

### BDNF\_locus\_in\_African\_Americans

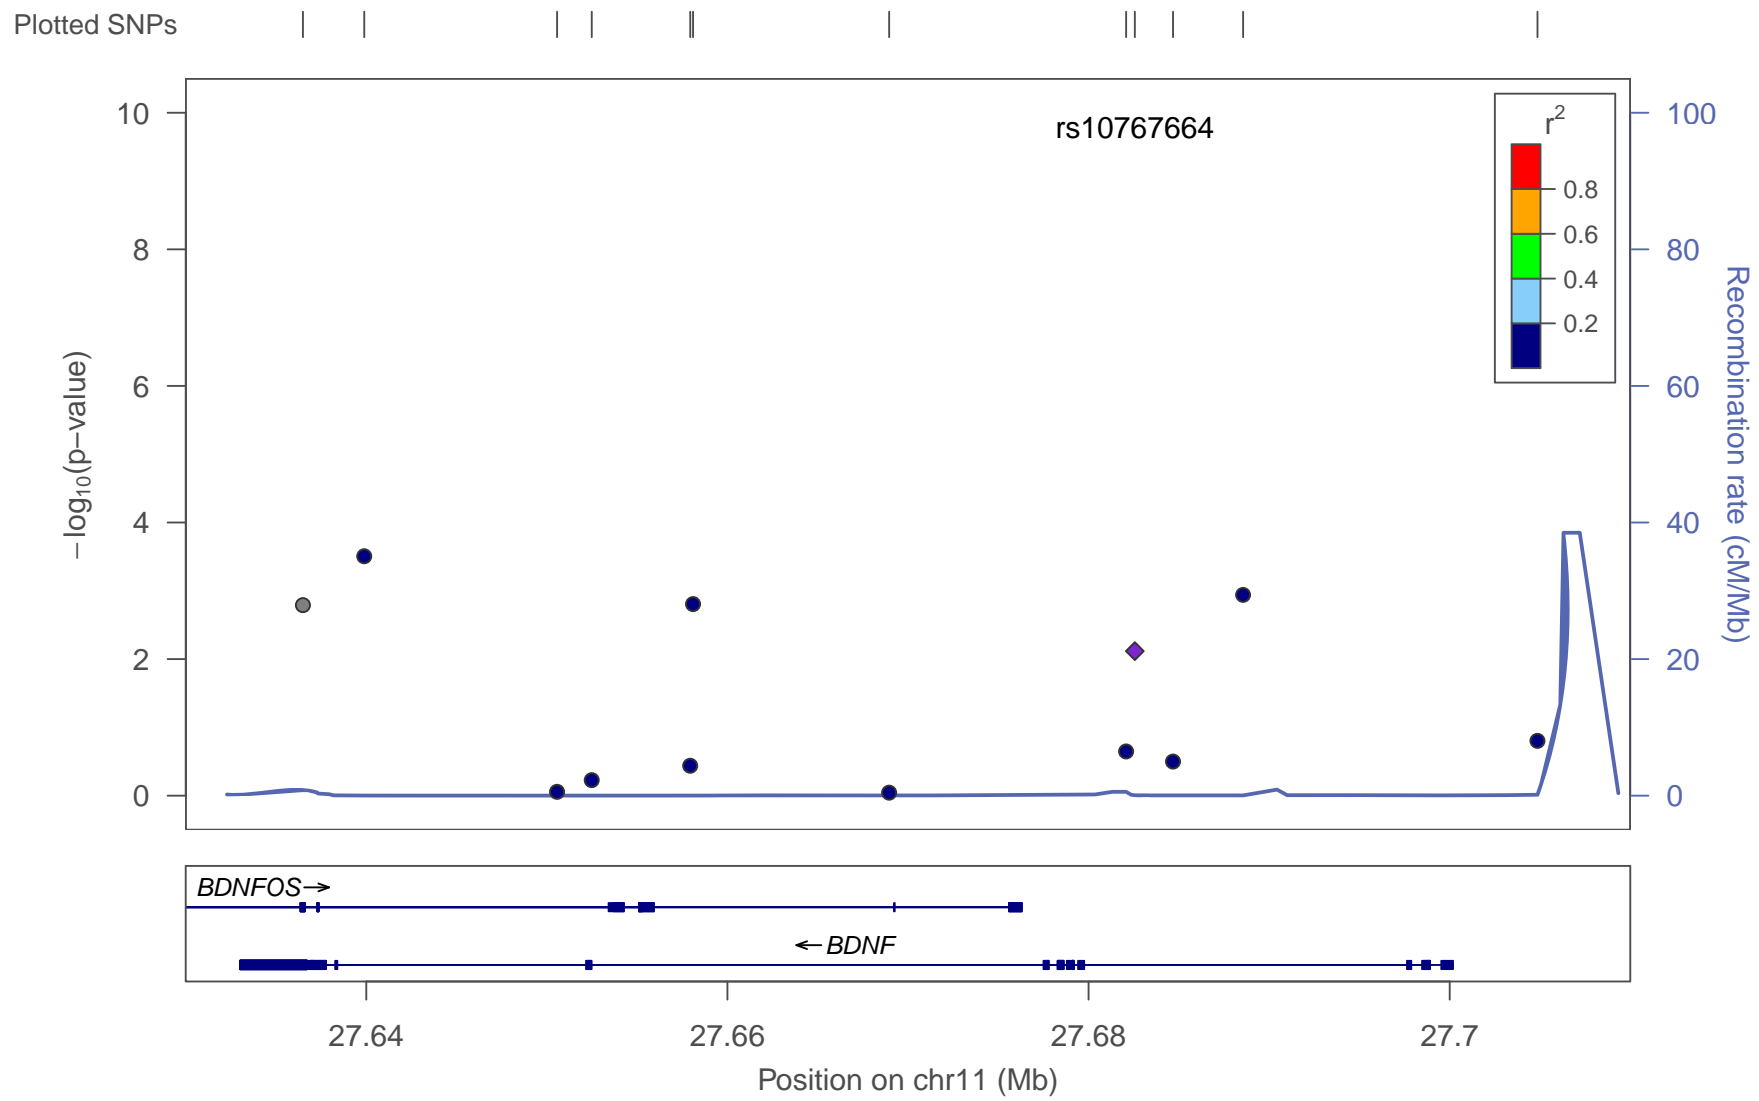

### BDNF\_locus\_in\_Hispanics

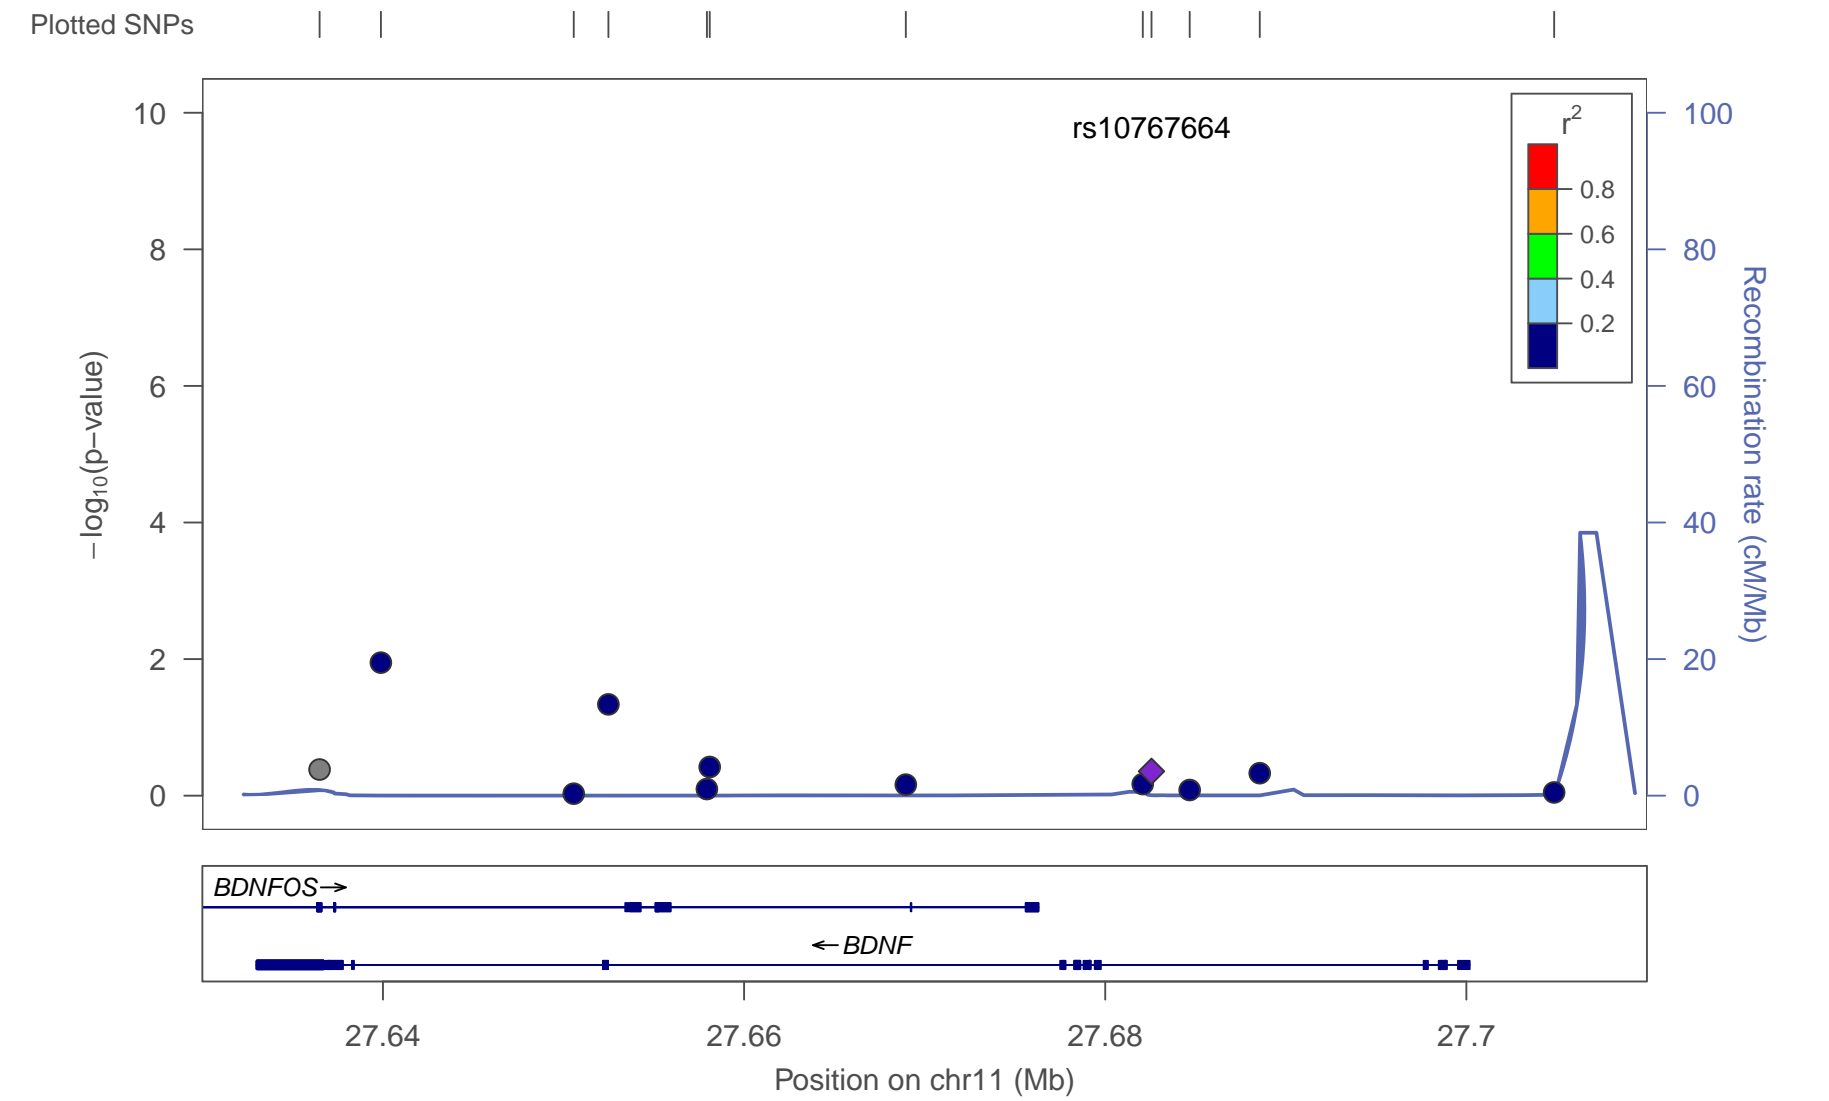

Supplement: supp_dds396_dds396supp_Fig12.pdf [file supp_dds396_dds396supp_Fig12.pdf]
