# Supplementary material
Source: PubMed Central journal article supplement (PMC3522401)

### SH2B1\_locus\_in\_European\_ancestry

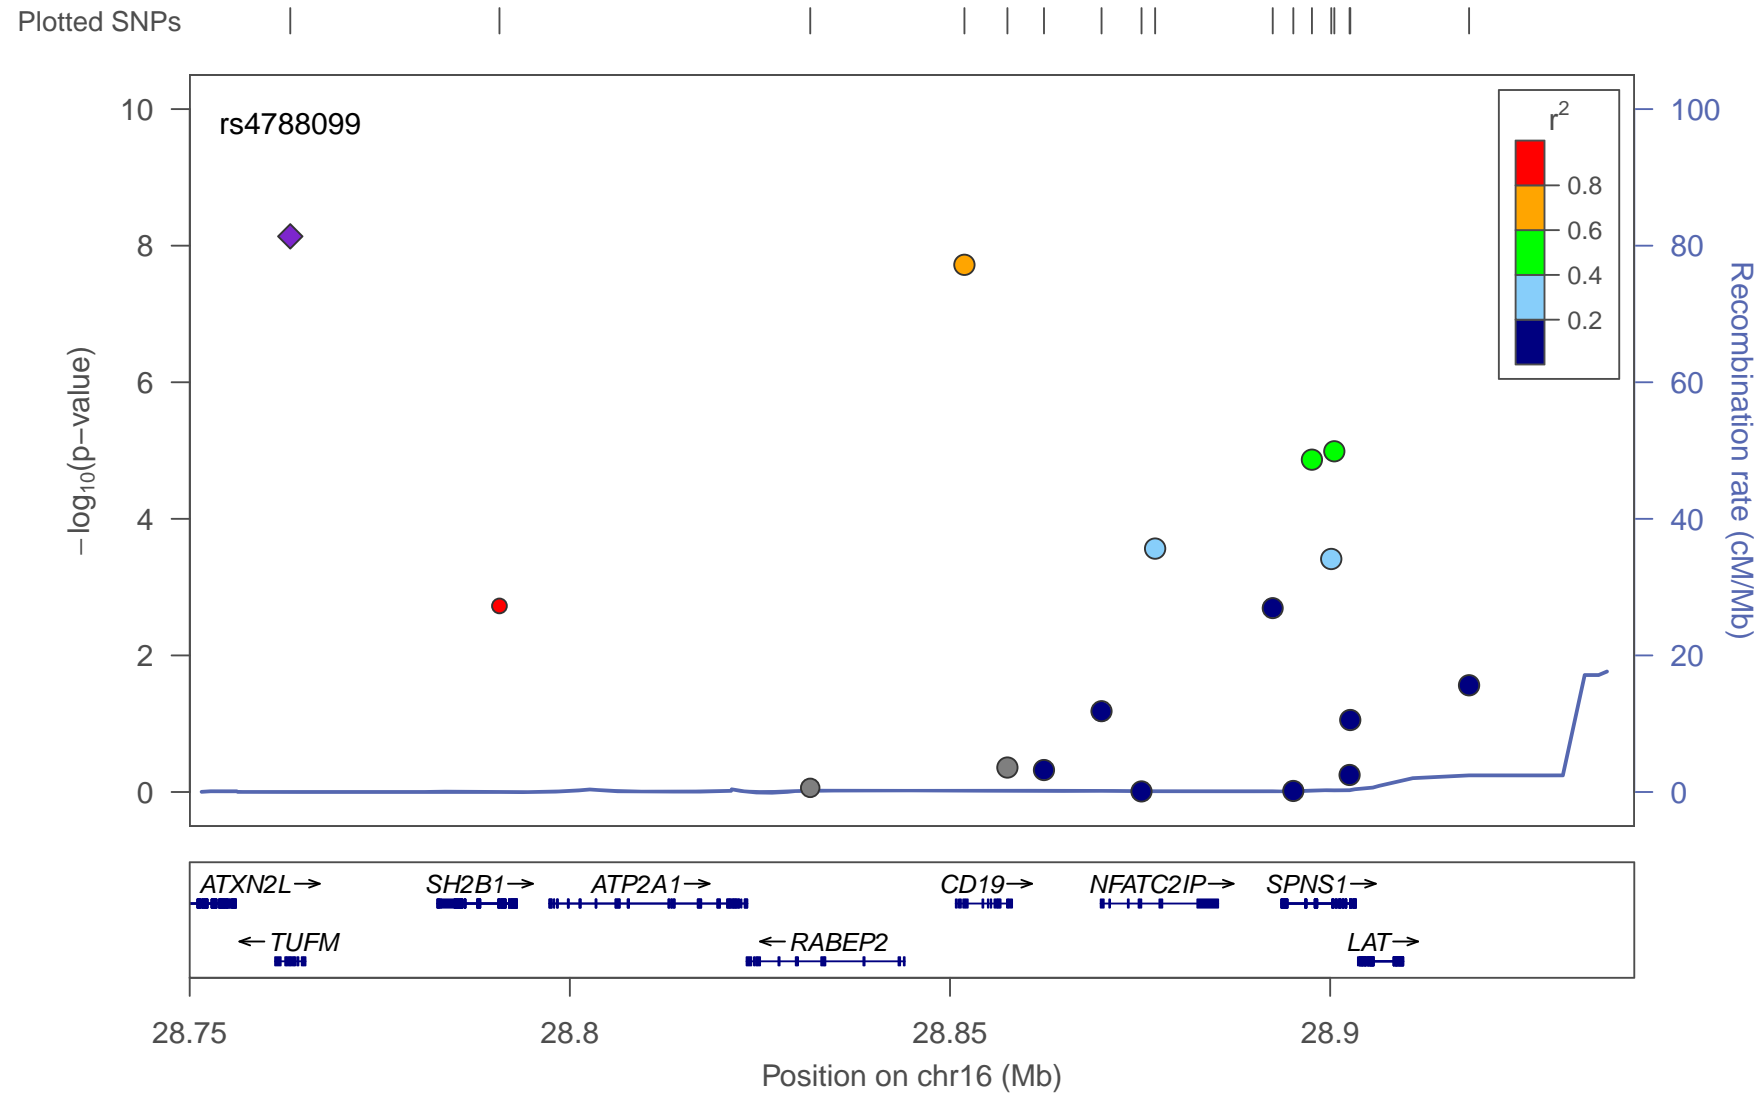

### SH2B1\_locus\_in\_East\_Asians

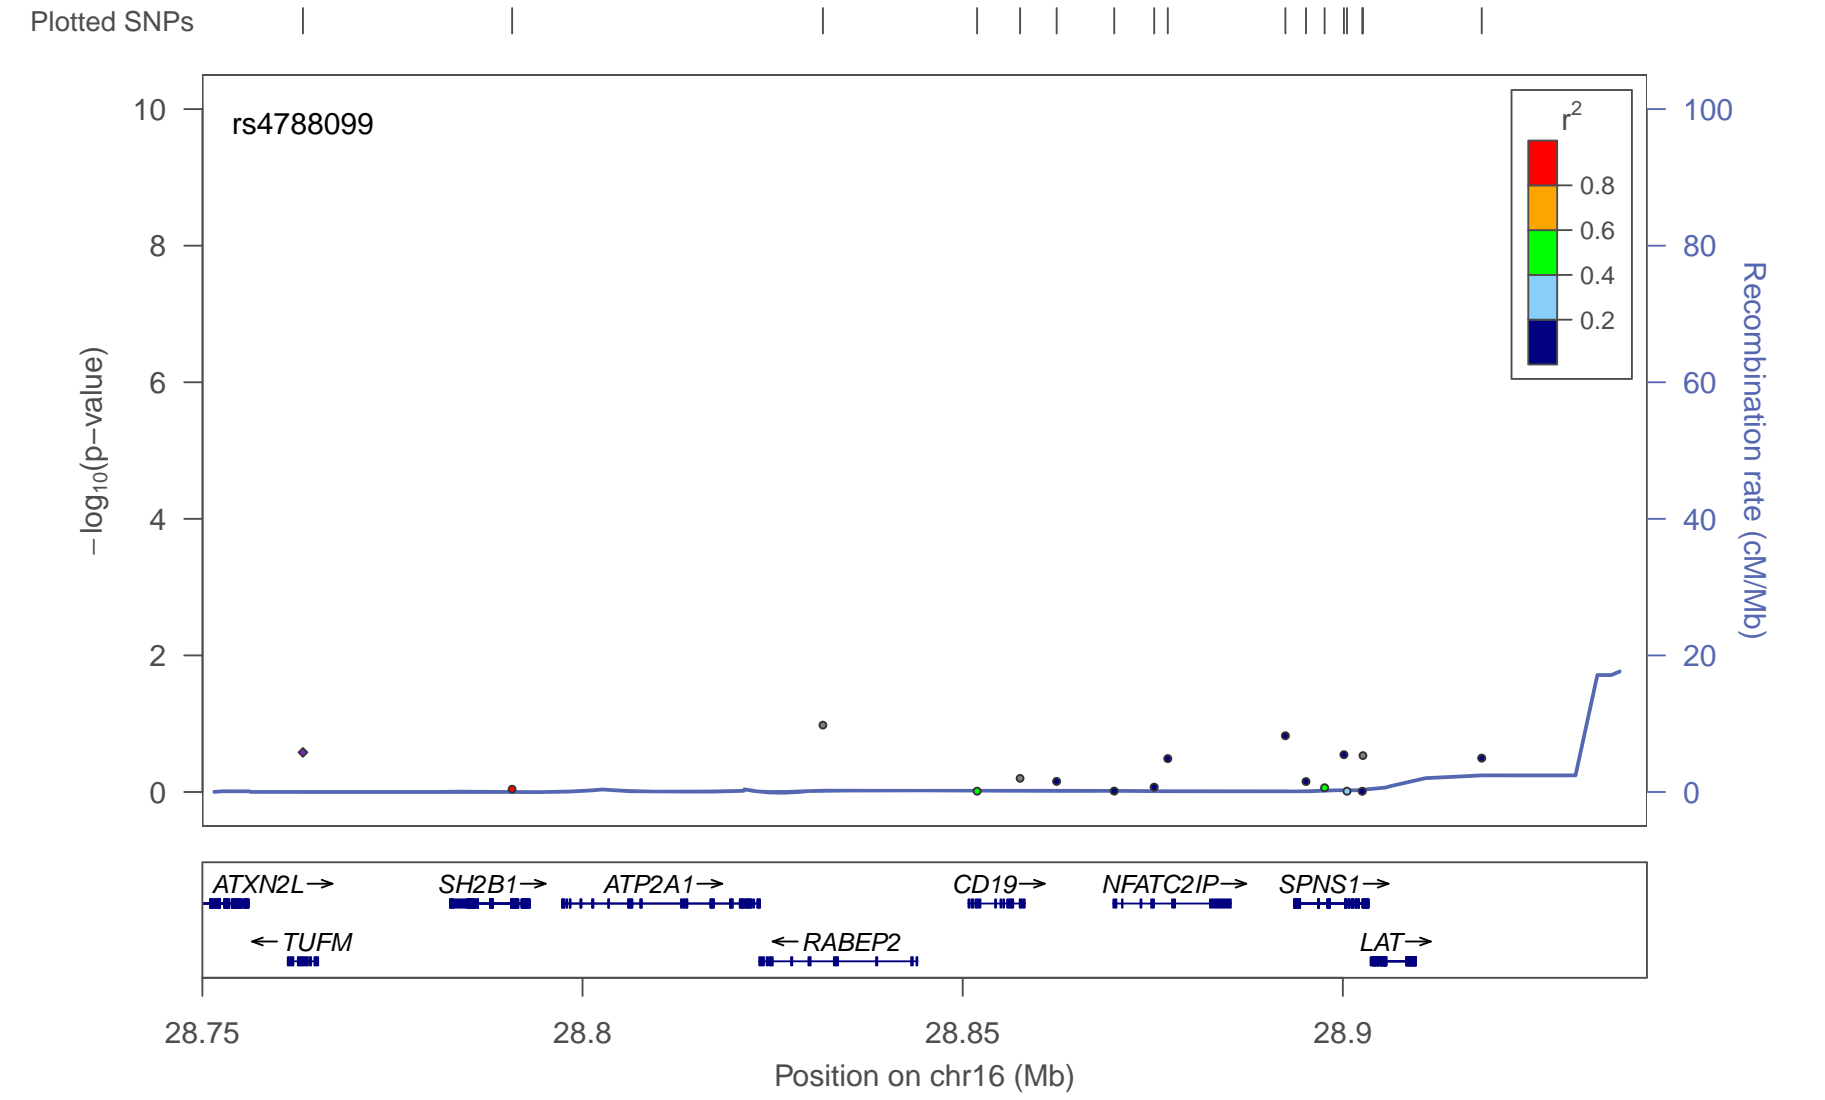

### SH2B1\_locus\_in\_African\_Americans

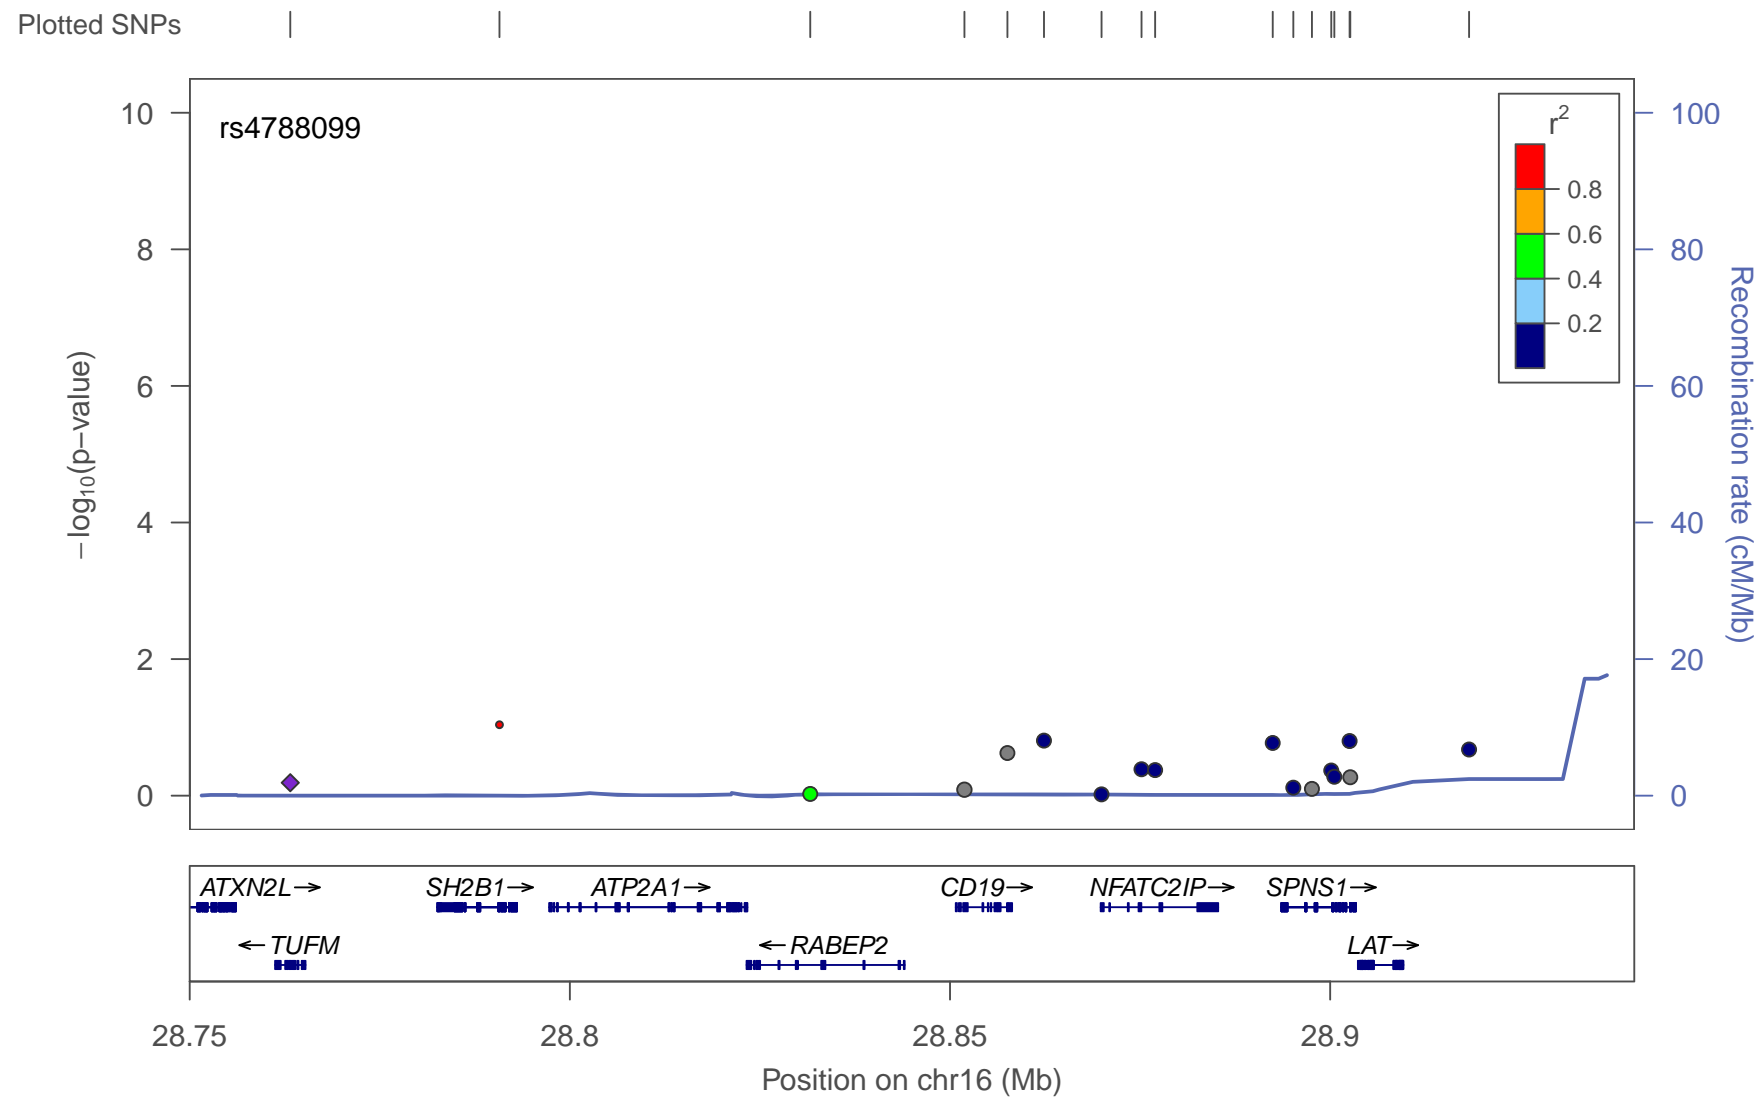

### SH2B1\_locus\_in\_Hispanics

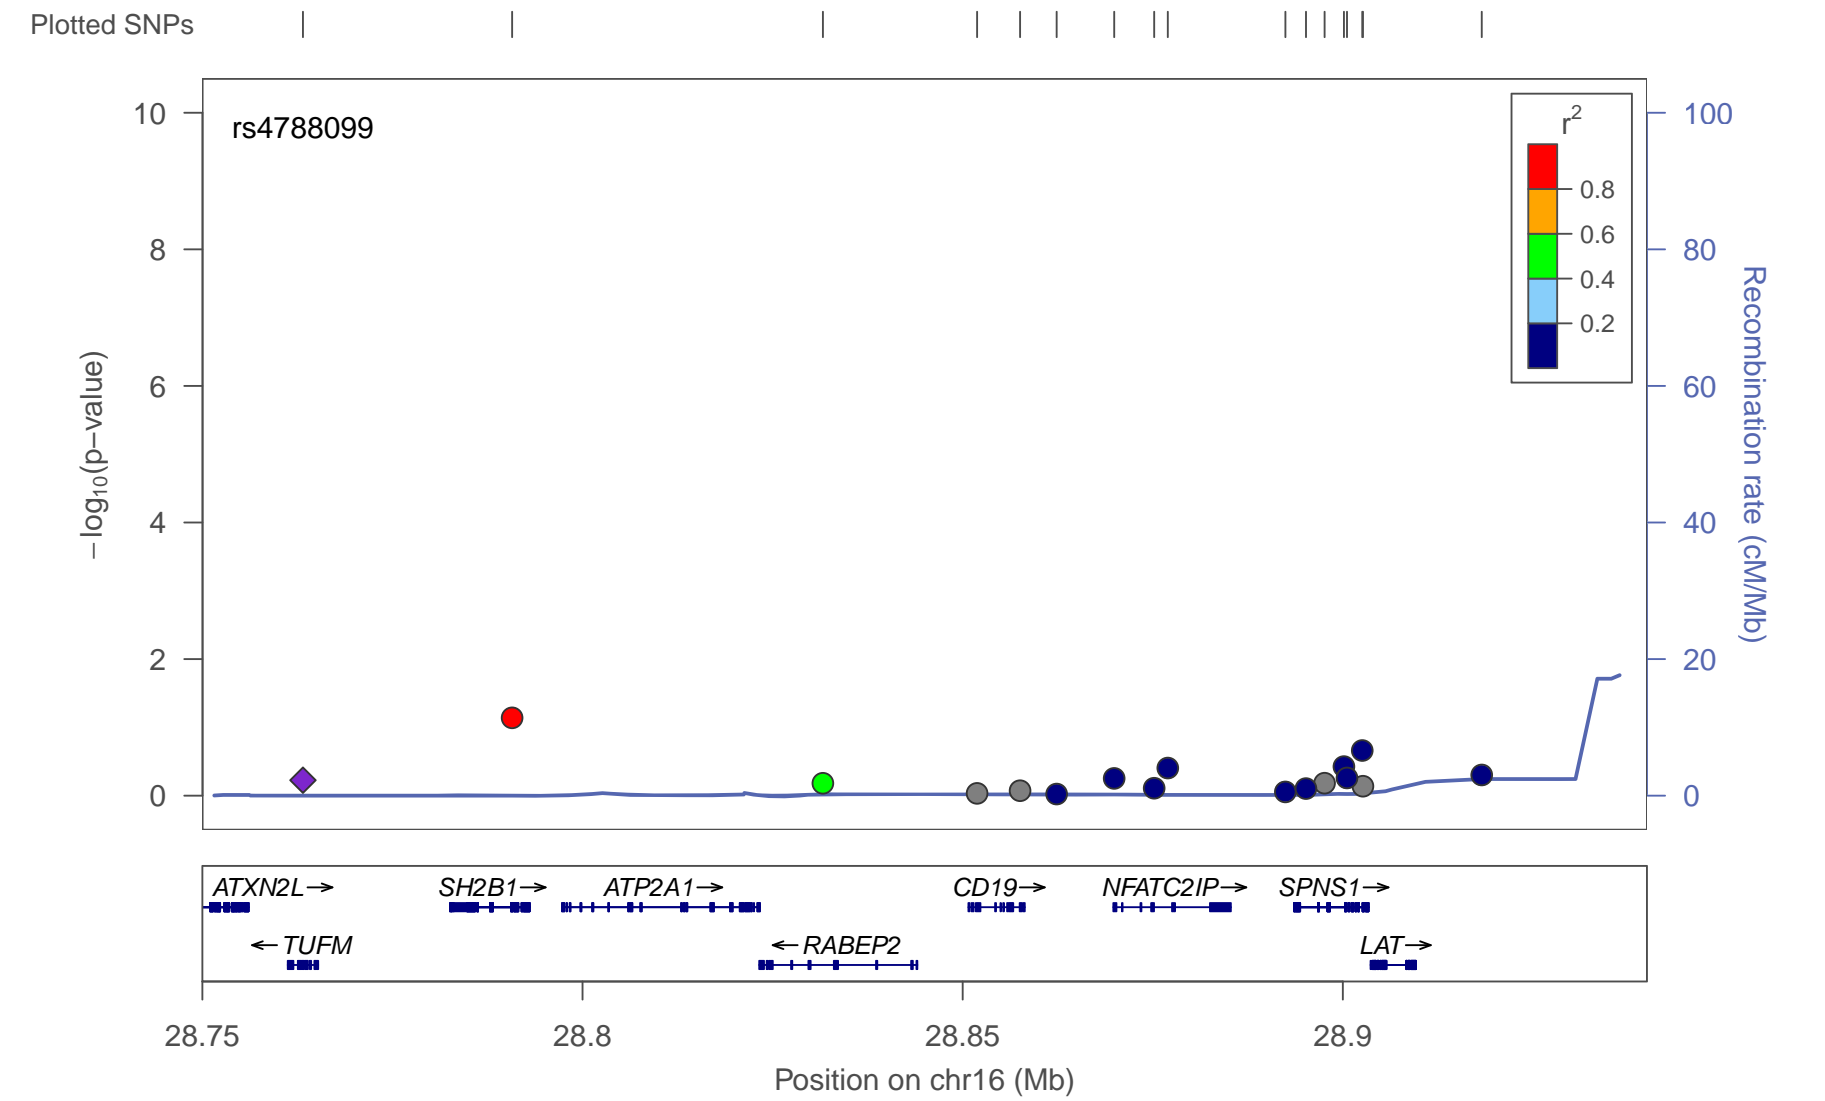

Supplement: supp_dds396_dds396supp_Fig14.pdf [file supp_dds396_dds396supp_Fig14.pdf]
