# Supplementary material
Source: PubMed Central journal article supplement (PMC3522401)

Effect size distribution for European ancestry

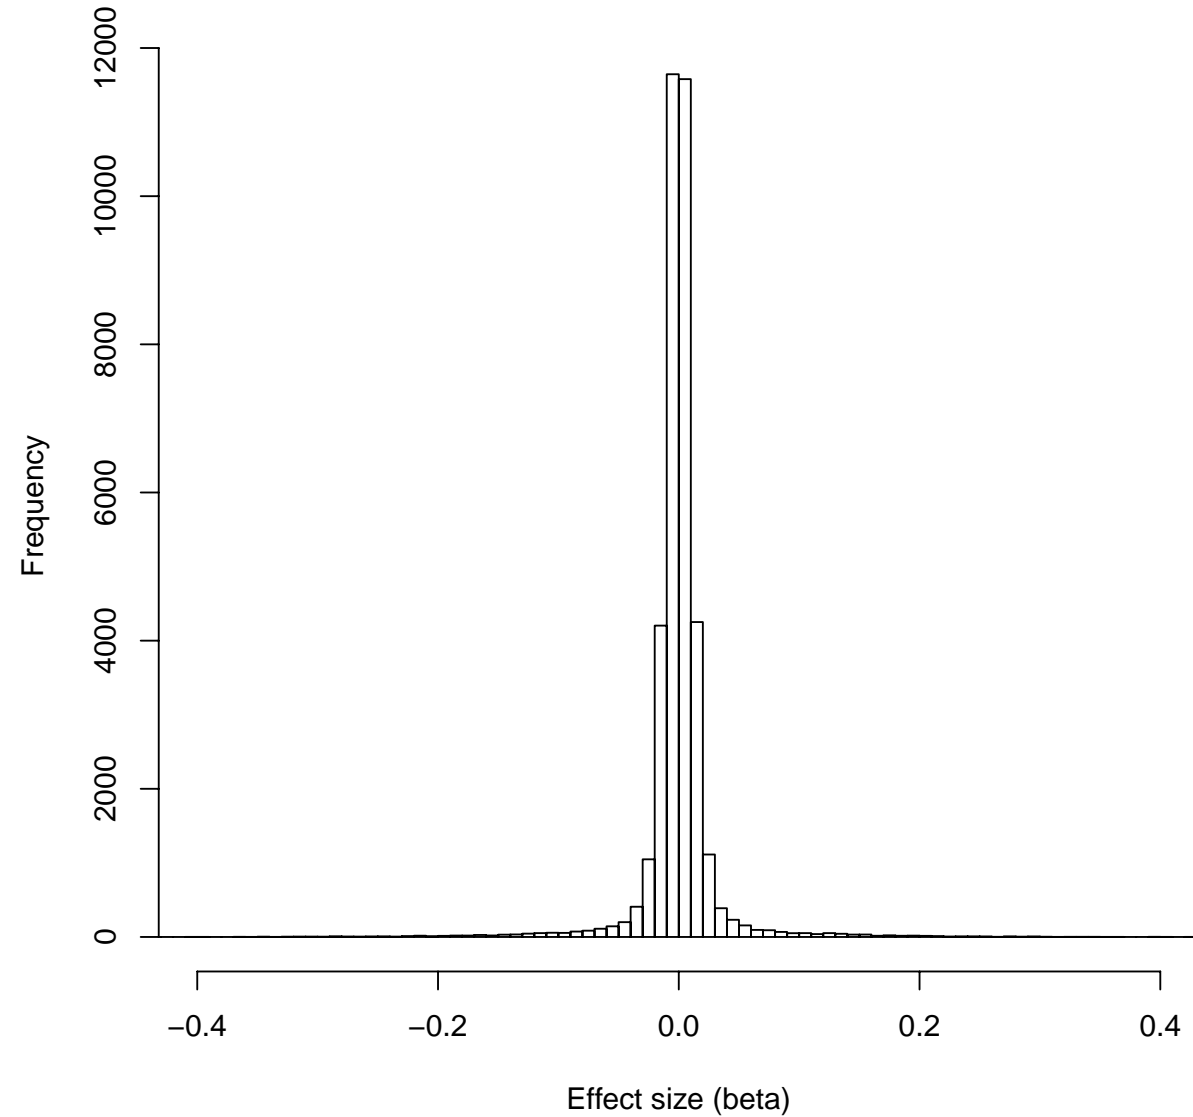

Effect size distribution for African Americans

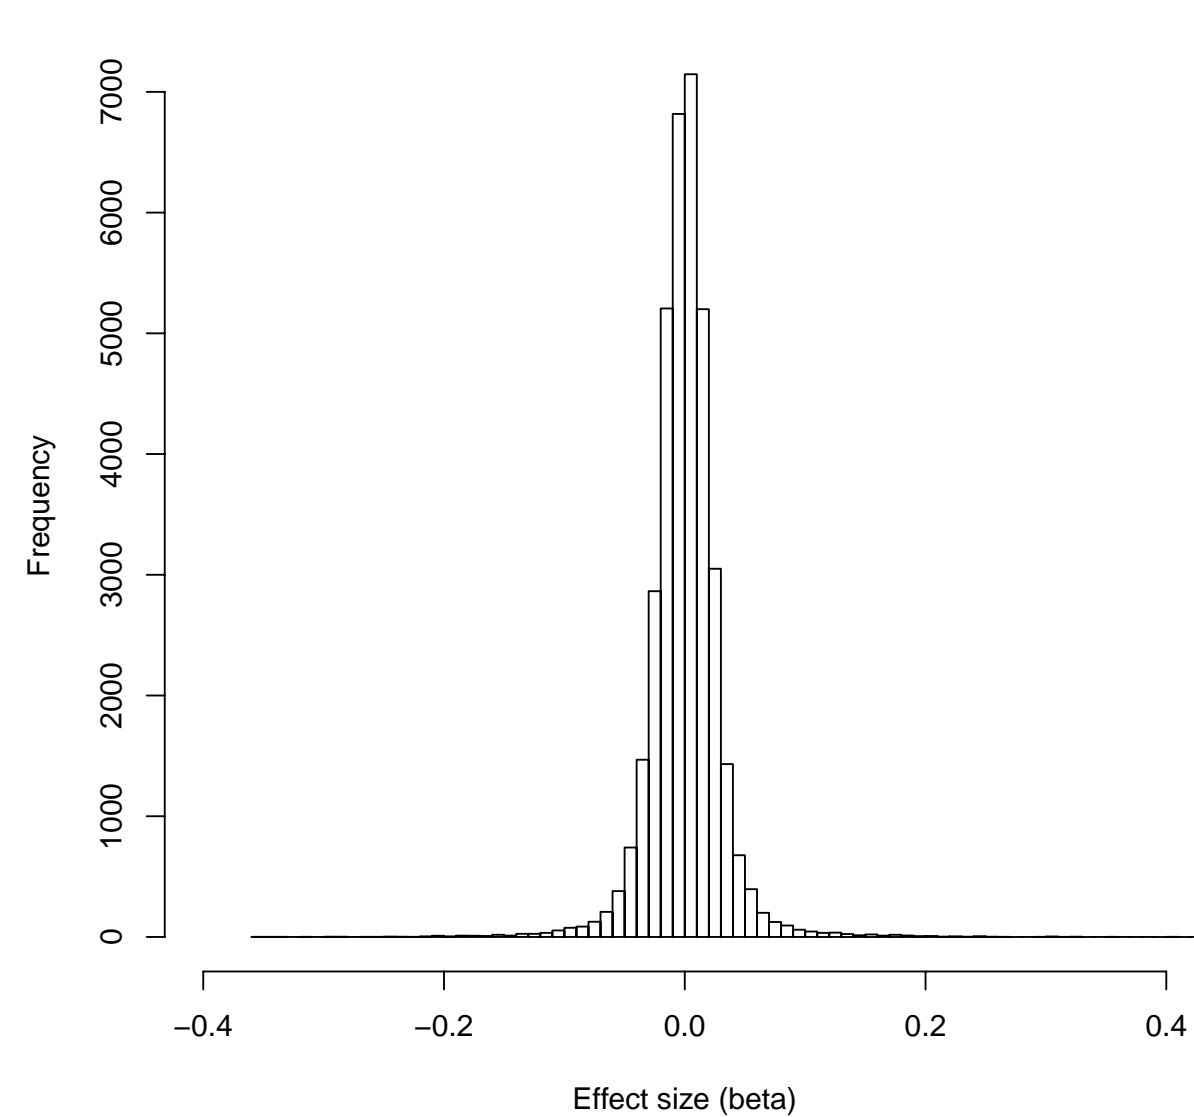

Effect size distribution for Hispanics

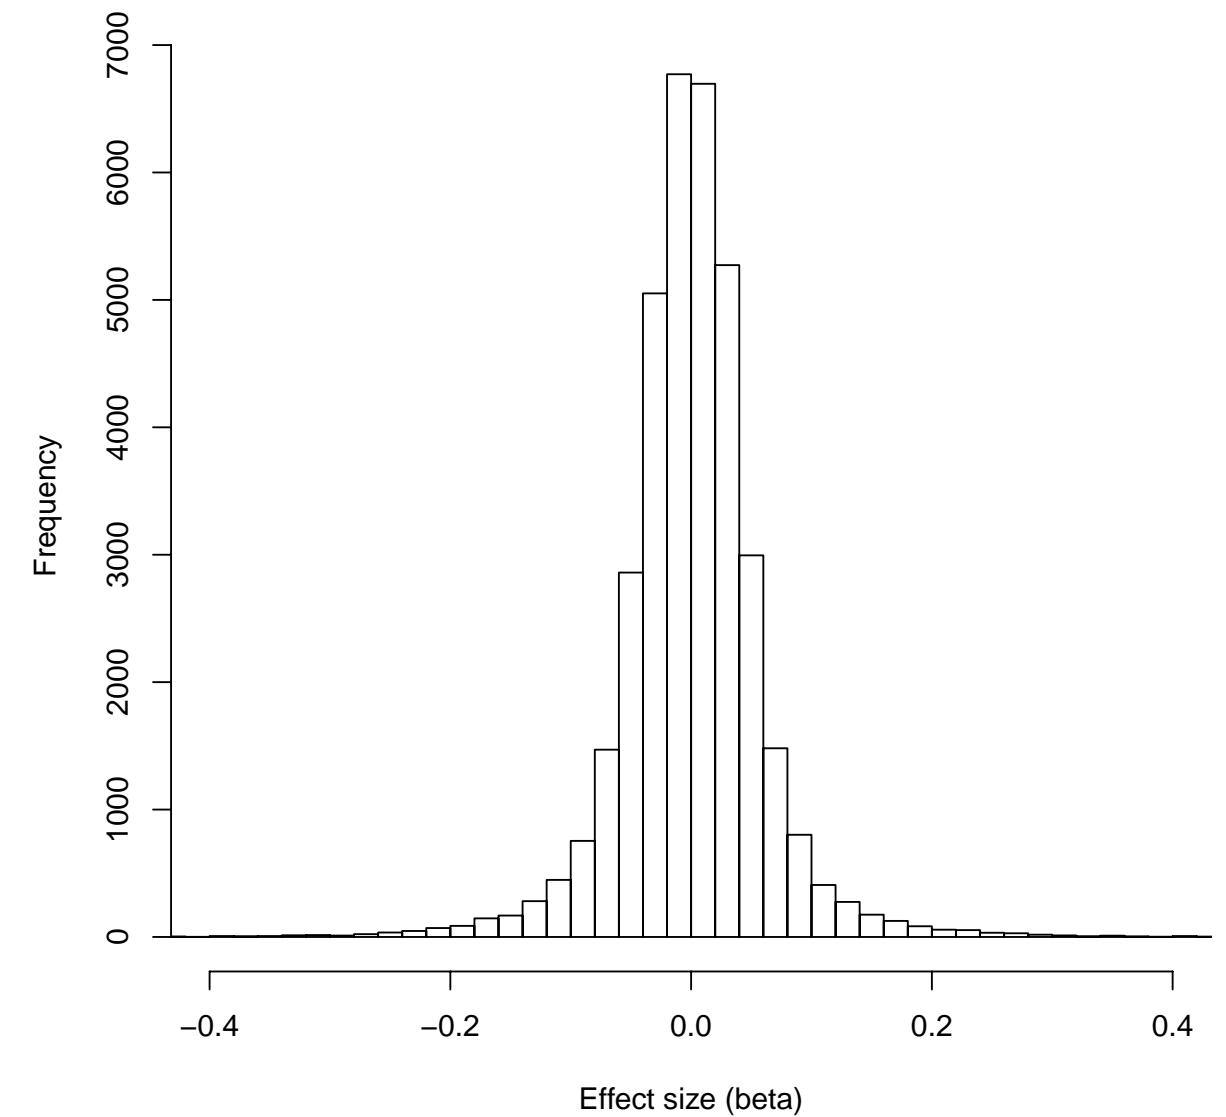

Supplement: supp_dds396_dds396supp_Fig16.pdf [file supp_dds396_dds396supp_Fig16.pdf]
