# Supplementary material
Source: PubMed Central journal article supplement (PMC3522401)

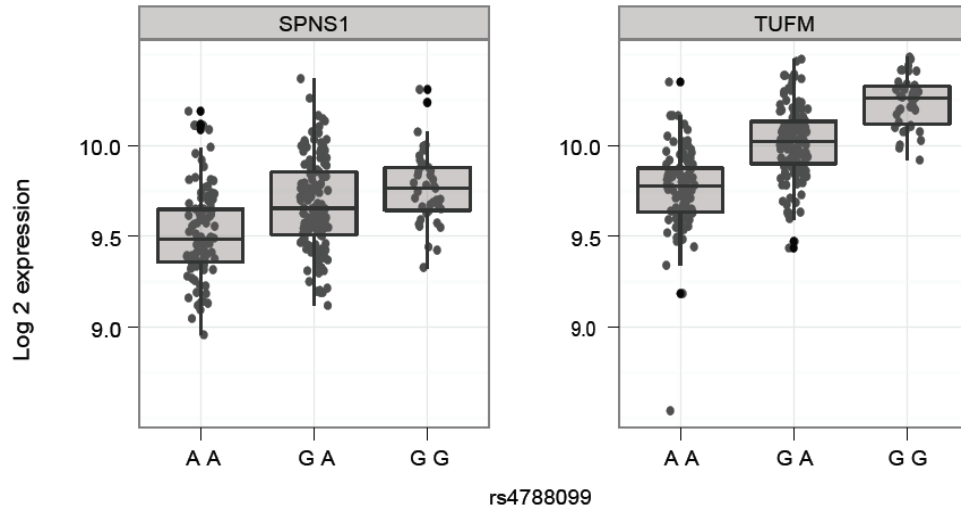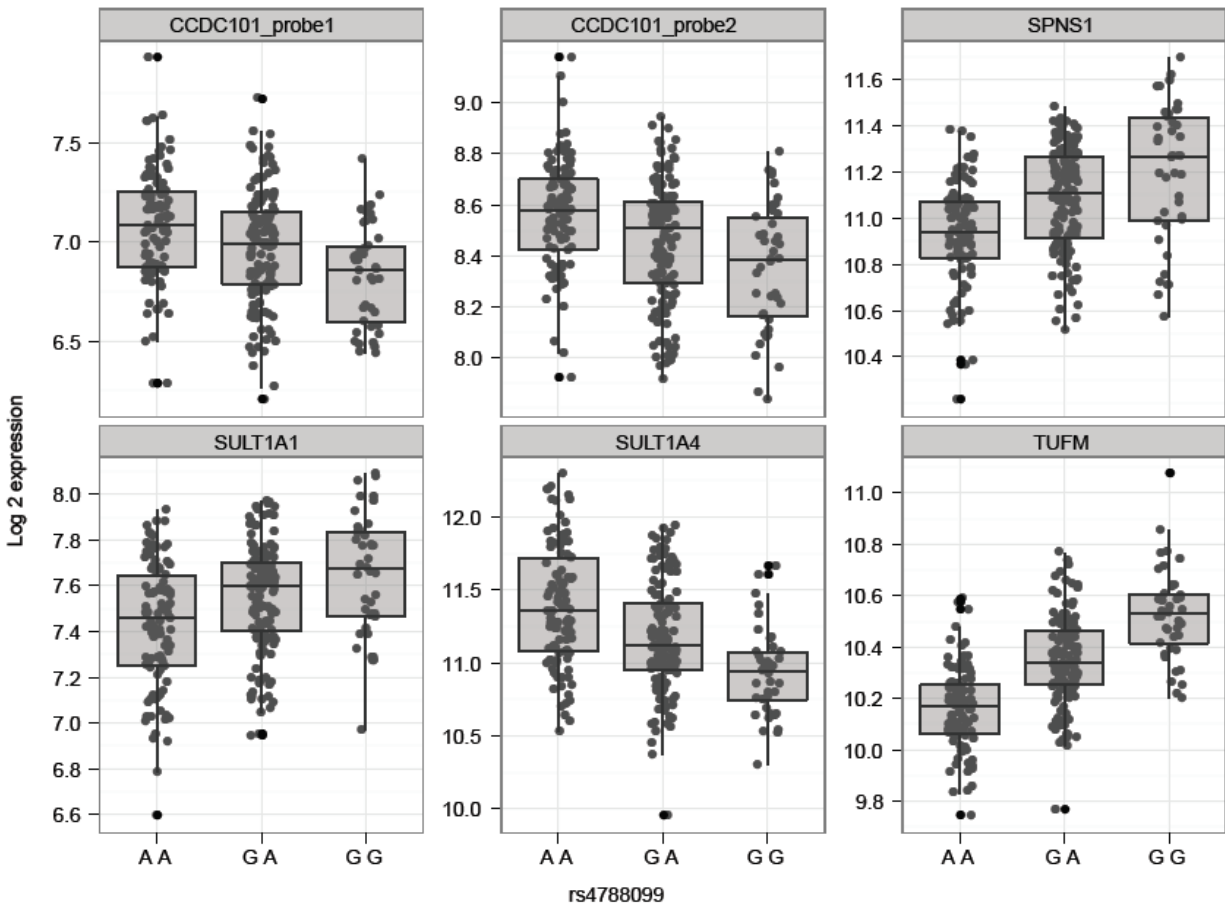

Supplement: supp_dds396_dds396supp_Fig17.pdf [file supp_dds396_dds396supp_Fig17.pdf]
